# Supplementary material
Source: Elsevier journal article supplement (https://www.sciencedirect.com/science/article/pii/S1695403318305204)
Supplement: mmc1 [file S1695403318305204:mmc1.doc]

ANEXO 1. Preguntas y opciones de respuesta de la encuesta enviada.

1. Respecto a los tipos básicos de fluidos intravenosos que existen. Señale la opción más correcta:
   1. Los fluidos hipotónicos son los sueros glucosalinos 0,20% (1/5) y los 0,33% (1/3), mientras que el isotónico es el glucosalino 0,9%.
   2. Solo el Ringer Lactato es un fluido intravenoso isotónico, no existe otro.
   3. Los isotónicos son tanto el 0,20% (1/5) como el 0,33% (1/3) y por supuesto el 0,9%.
2. El tipo de fluidoterapia intravenosa de mantenimiento para un paciente pediátrico en normonatremia, que mejor describe mi práctica clínica en mi ámbito de trabajo es:
   1. Utilizo de forma general el suero glucosalino 0,9% y apenas los glucosalinos 1/5 y 1/3.
   2. Utilizo indistintamente los glucosalinos 0,20% (1/5), 0,33% (1/3) y/o glucosalino 0,9%.
   3. Utilizo de forma general los glucosalinos del tipo 0,20% (1/5) y del tipo 0,33% (1/3) y a penas el glucosalino 0,9%.
3. Respecto al volumen de reposición en la fluidoterapia intravenosa de mantenimiento cada 24 horas:
   1. Me ciño a la regla de "Holliday and Segar".
   2. Utilizo volúmenes inferiores, aproximadamente un 80% del volumen según la regla de "Holliday and Segar".
   3. Utilizo volúmenes superiores a los de la regla de "Holliday and Segar", entre un 10 y un 20% más.
4. Respecto a la adición de cloruro potásico a la fluidoterapia intravenosa de mantenimiento en pediatría:
   1. Siempre pauto añadir el cloruro potásico al gotero desde el inicio de su infusión o utilizo un tipo de fluidos que ya llevan incorporado el potasio.
   2. Dejo pautado que se añada el potasio al gotero, cuando el paciente haya realizado diuresis.
   3. Tomo esta decisión dependiendo del estado clínico y/o del grado de deshidratación del paciente. Si su situación clínica no es buena o el paciente se encuentra deshidratado pospongo la adición del cloruro potásico tras corroborar diuresis.
5. ¿Qué cantidad en mililitros de cloruro potásico 2 molar (ClK 2M), añade al gotero del paciente en su fluidoterapia intravenosa de mantenimiento?
   1. 5 mL de CLK 2M por kg de peso del paciente, para 24 horas de infusión.
   2. En pacientes con menos de 10 kg de peso, añado 2-3 cc de ClK 2M por cada 500 cc de fluidos a infundir y en pacientes con más de 10 kg de peso añado 5 cc de ClK 2M por cada 500 cc de fluidos.
   3. No tengo en cuenta la cantidad de cloruro potásico que lleva el gotero de mantenimiento, pues utilizo unos fluidos estándar que llevan ya las cantidades de ClK necesarias.
   4. Utilizo unas cantidades en función de las necesidades basales de este electrolito, 20-30 mEq/L de líquido a infundir.
   5. Ninguna de estas opciones describe mi práctica clínica habitual a este respecto.
6. Si a la pregunta anterior ha respondido con la última opción, por favor, indique brevemente cual es su pauta habitual respecto a las cantidades de cloruro potásico que componen los fluidos IV de mantenimiento que usted suele utilizar (*respuesta de texto libre*).
7. Qué respuesta describe mejor mi actitud habitual respecto al contenido de calcio en la fluidoterapia intravenosa de mantenimiento que utilizo:
   1. Añado una cantidad de calcio al gotero en función de las necesidades basales de este elemento que son de 20-40 mg/kg/día y de 40-80 mg/kg/día en niños y lactantes respectivamente.
   2. Añado una ampolla de gluconato cálcico (10 mL) por cada 500 cc de líquidos a infundir.
   3. En la fluidoterapia intravenosa de mantenimiento en los pacientes pediátricos no añado calcio habitualmente.
8. Las novedades o no que han ido surgiendo respecto a la fluidoterapia de mantenimiento intravenosa en pediatría, las voy incorporando mediante (elija la opción más cierta):
   1. Lectura individual de libros y manuales de pediatría.
   2. Lectura individual de literatura científica en revistas (guías clínicas, ensayos clínicos, revisiones, metaanálisis, etc...).
   3. Asistencia a cursos, congresos y jornadas científicas.
   4. Las sesiones clínicas en equipo que se realizan en mi ámbito de trabajo más inmediato (el Centro de Salud o el Servicio Médico dónde trabajo).
   5. Conversaciones de carácter informal con otros colegas de profesión.
9. Respecto a este tema de la fluidoterapia intravenosa de mantenimiento en pediatría, en mi equipo de trabajo:
   1. Existe consenso verbal únicamente pues no hemos realizado ningún protocolo por escrito.
   2. Existe consenso tanto verbal como escrito, pues hemos elaborado un protocolo al respecto.
   3. No existe consenso verbal ni escrito y cada uno toma las decisiones que considera más adecuadas al respecto.
10. Por favor, responda a la siguiente pregunta solo en el caso de que usted haya dado como respuesta válida a la pregunta número 2, la primera opción, glucosalino 0,9%. De lo contrario siga adelante con el cuestionario pasando a la siguiente sección. Aproximadamente, ¿cuánto tiempo lleva utilizando el suero glucosalino 0,9% como fluidoterapia de mantenimiento IV en pediatría?
    1. Más de 5 años.
    2. Entre 2 y 5 años.
    3. Menos de 2 años.
11. Soy médico:
    1. Especialista en Medicina Familiar y Comunitaria (MFyC).
    2. Especialista en Pediatría y sus Áreas específicas.
    3. Residente de MFyC.
    4. Residente de Pediatría.
    5. Especialista en Cirugía Pediátrica.
    6. Residente de Cirugía Pediátrica.
    7. Especialista quirúrgico/anestesista de adultos pero que atiendo también a pacientes pediátricos.
    8. Residente de alguna especialidad quirúrgica/anestesia de adultos pero que atiendo también a pacientes pediátricos.
12. Mi ámbito de trabajo es:
    1. Atención Primaria y hago guardias en la urgencia hospitalaria.
    2. Urgencias hospitalarias exclusivamente.
    3. Hospital, pero hago guardias en la urgencia hospitalaria.
    4. Hospital, sin guardias en la urgencia.
    5. Hospital, en una Unidad de Cuidados Intensivos Pediátrica.
13. Soy:
    1. Mujer.
    2. Varón.
14. Mis años de experiencia/trabajo desde que finalicé la residencia son:
    1. Menos de 5 años de experiencia.
    2. Entre 5 y 15 años de experiencia.
    3. Más de 15 años de experiencia desde que finalicé la residencia.
    4. Soy todavía médico residente.
15. Mi lugar de trabajo es:
    1. Centro público.
    2. Centro privado.
    3. Trabajo en ambos, tanto público como privado.
16. Desempeño mi labor profesional en la provincia de (*respuesta de texto libre*):
17. El país en el que desempeño mi labor profesional es (*respuesta de texto libre*):
18. Respecto a esta investigación, el lanzamiento de esta encuesta:
    1. Considero que está bien hecha y que los resultados pueden ser útiles para los profesionales y para los usuarios.
    2. Considero que no está bien hecha y que no van a poder extraerse conclusiones útiles.
19. Tengo sugerencias sobre el diseño y/o futuros resultados del estudio que son estas (*respuesta de texto libre*).
